# Supplementary material for: Relational implementation techniques
Source: Royal Society of Chemistry journal article supplement (doi:10.1039/d2cp05821a), 1998-07-01
Supplement: d2cp05821a2.pdf [file d2cp05821a2.pdf]

***In Silico* Capture and Activation of Methane with Light Atom Molecules**

Stefan Mebs,<sup>1\*</sup> Jens Beckmann<sup>2</sup>

<sup>1</sup> *Institut für Experimentalphysik, Freie Universität Berlin, Arnimallee 14, 14195 Berlin,  
Germany*

<sup>2</sup> *Institut für Anorganische Chemie und Kristallographie, Universität Bremen,  
Leobener Straße 7, 28359 Bremen, Germany*

**Supporting Information**

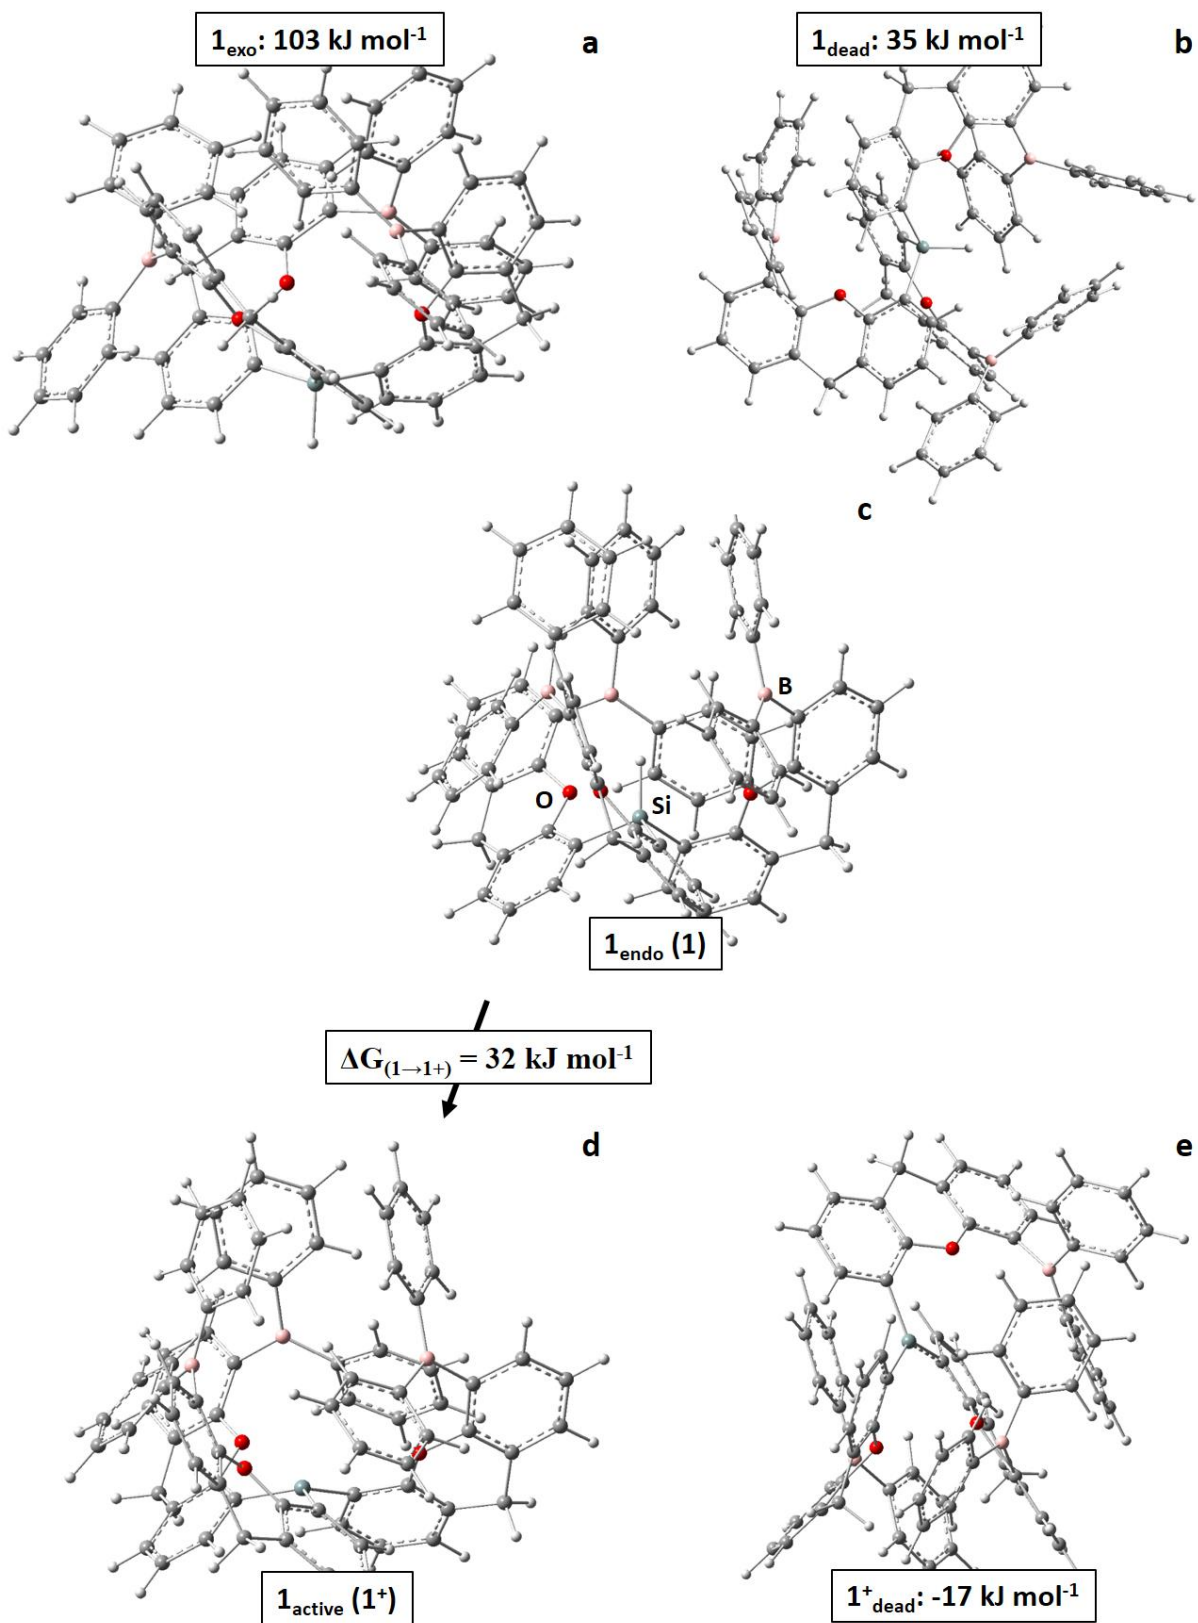

**Figure S1.** Structures and relative energies ( $\Delta E$ ) or enthalpies ( $\Delta G$ ) of  $1_{\text{exo}} (1)$  (a),  $1_{\text{dead}}$  (b),  $1_{\text{endo}} (1)$  (c),  $1^+_{\text{active}} (1^+)$  (d), and  $1^+_{\text{dead}}$  (e).

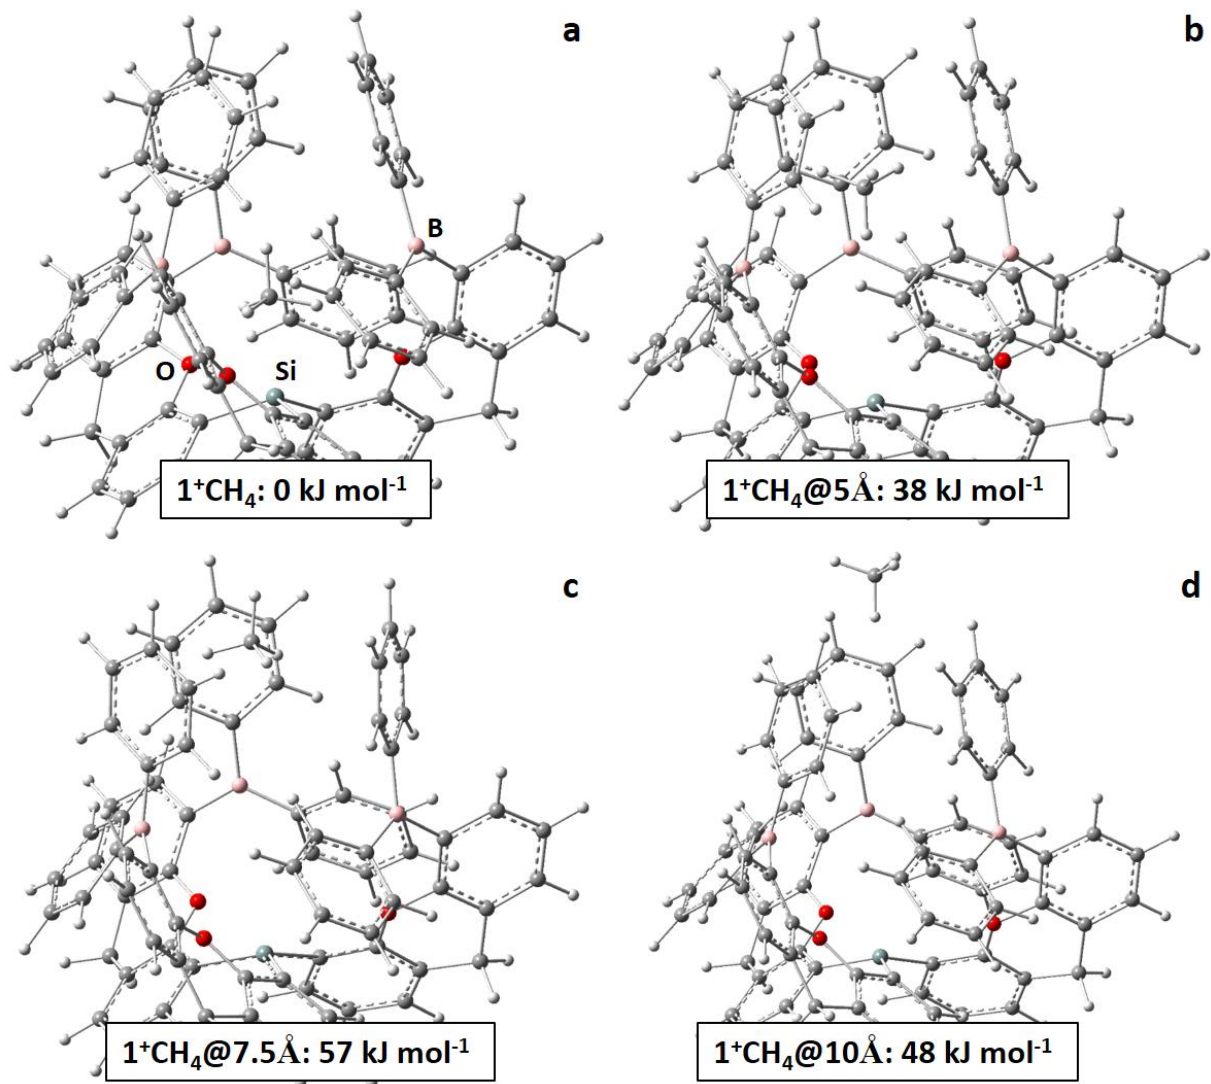

**Figure S2.** Structures and relative energies ( $\Delta E$ ) of  $1^+\text{CH}_4$  (a), and  $1^+\text{CH}_4$  at fixed Si $\cdots$ C distances of 5.0 Å (b), 7.5 Å (c), and 10.0 Å (d).

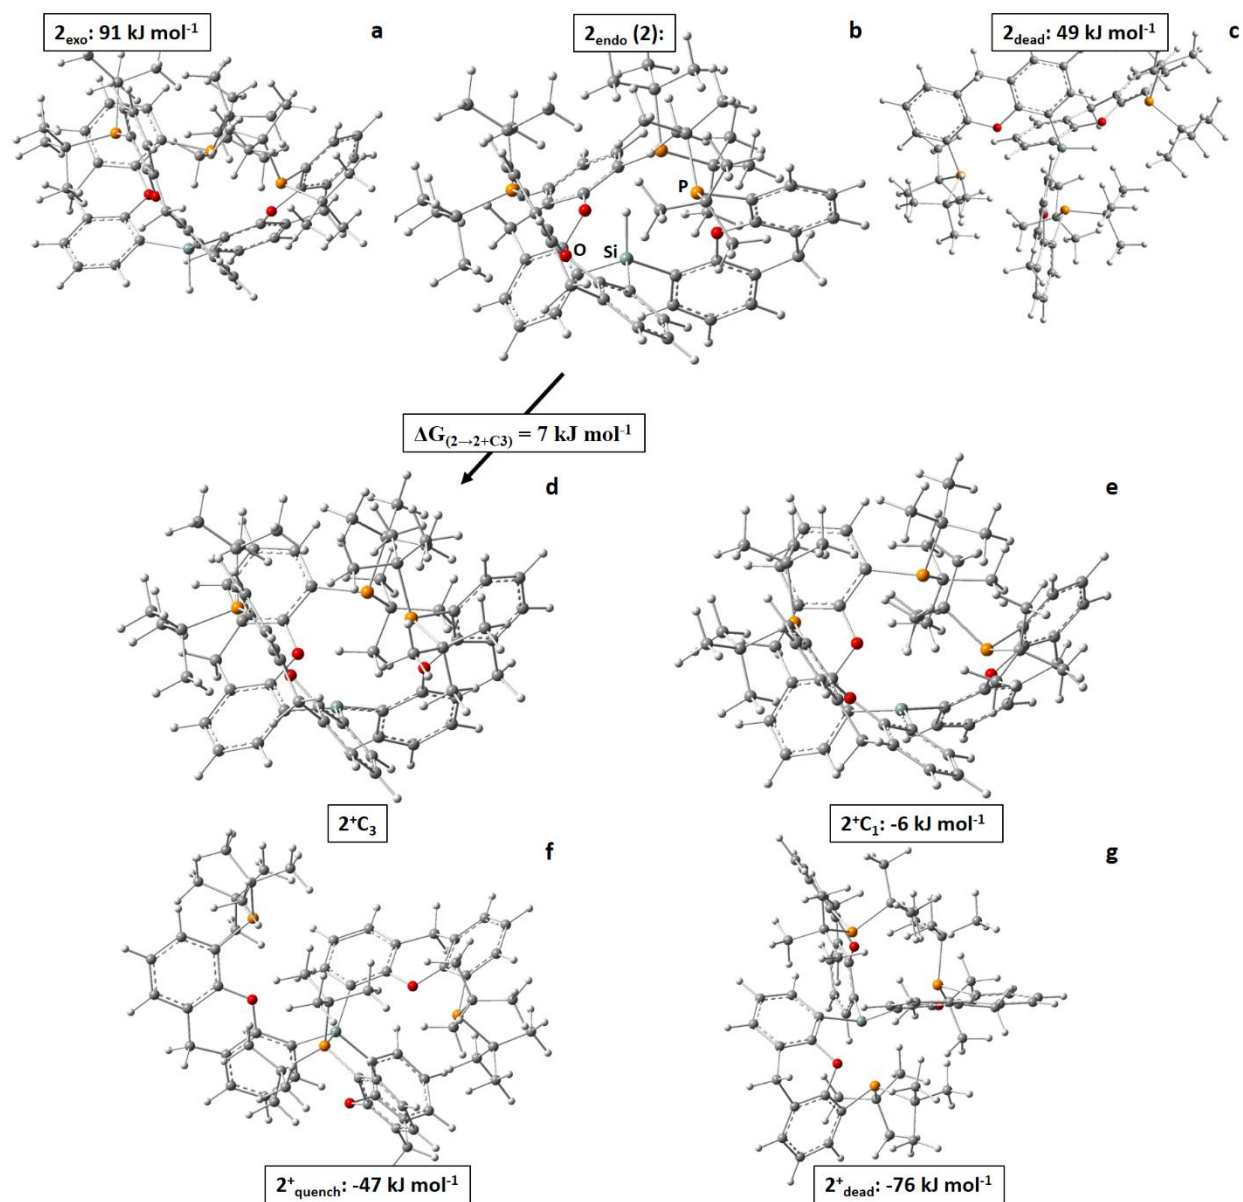

**Figure S3.** Structures and relative energies ( $\Delta E$ ) or enthalpies ( $\Delta G$ ) of  $2_{\text{exo}}$  (a),  $2_{\text{endo}} (2)$  (b),  $2_{\text{dead}}$  (c),  $2^+C_3$  (d),  $2^+C_1$  (e),  $2^+_{\text{quench}}$  (f), and  $2^+_{\text{dead}}$  (g).

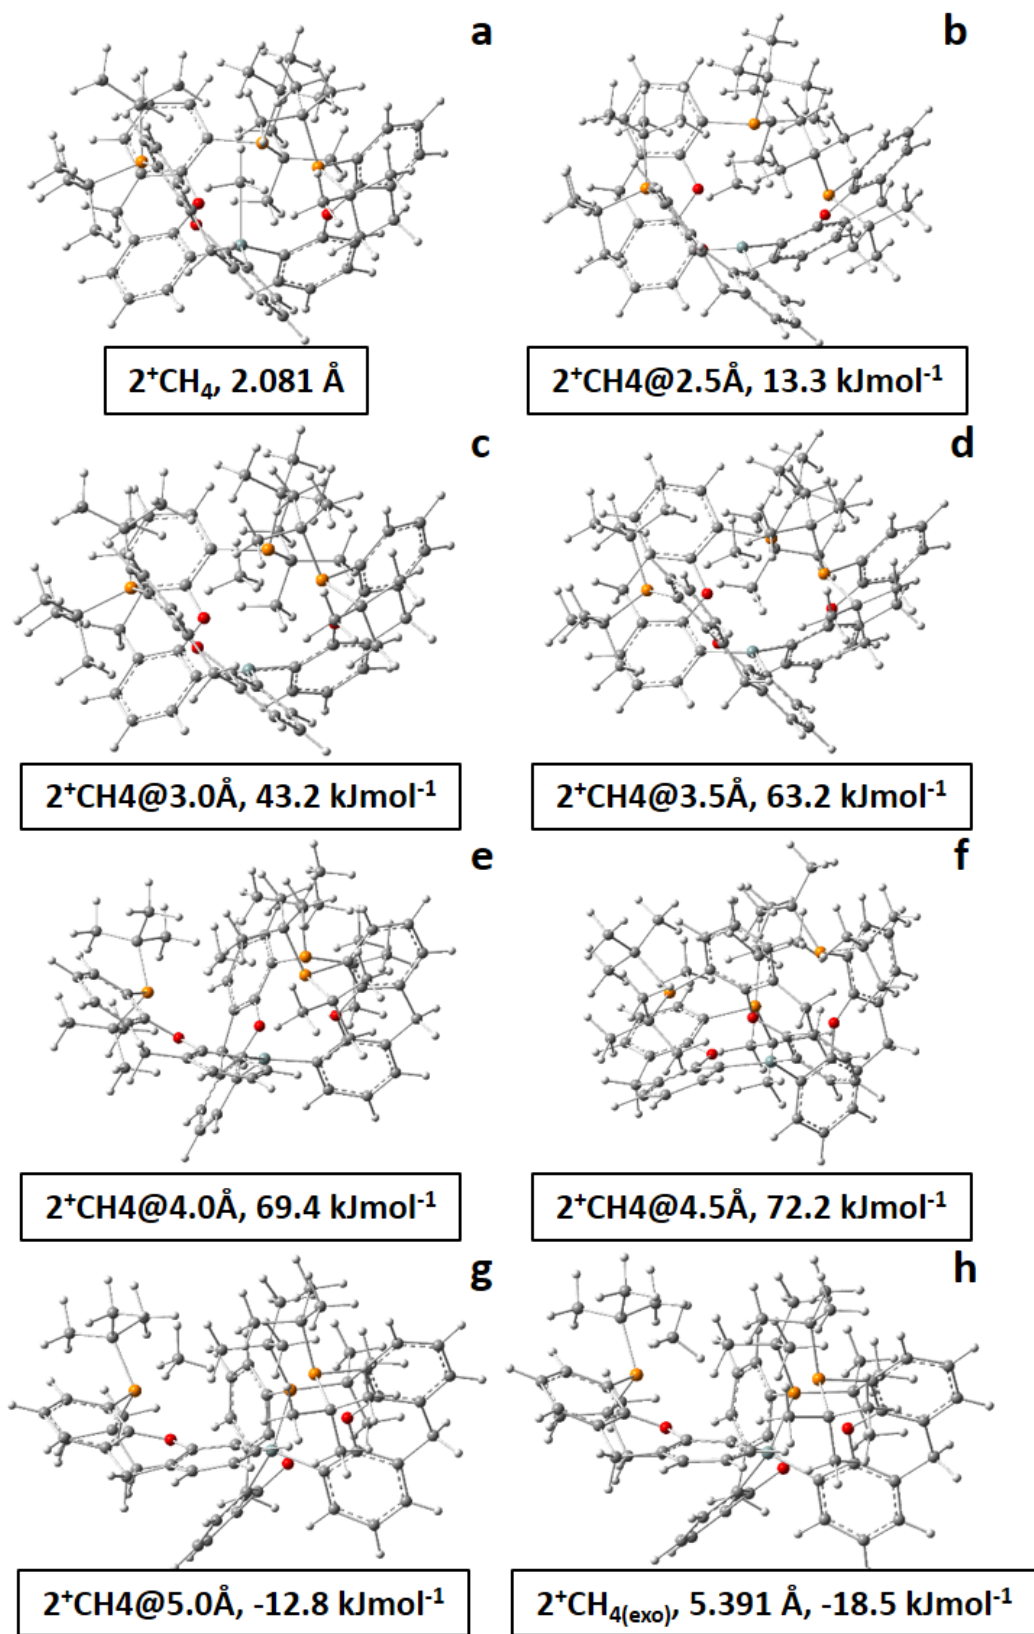

**Figure S4.** Structures and relative energies ( $\Delta E$ ) of  $2^+\text{CH}_4$  (a), and  $2^+\text{CH}_4$  at fixed Si...C distances of 2.5-5.0 Å (b-g), (h) free optimization with  $\text{CH}_4$  fragment outside the void.

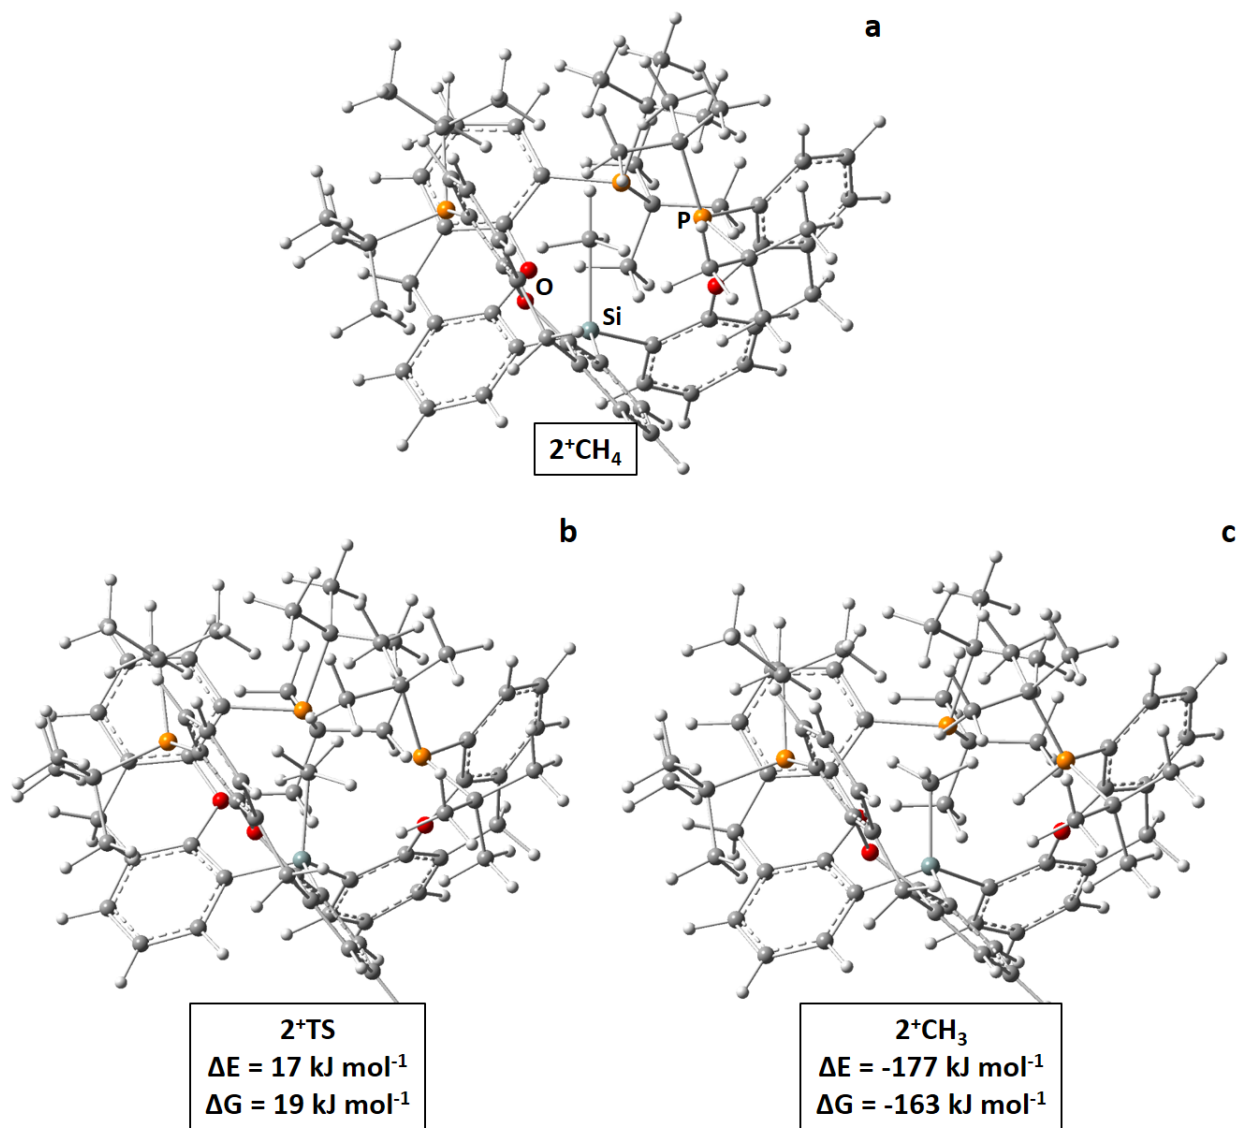

**Figure S5.** Structures and relative energies ( $\Delta E$ ) and enthalpies ( $\Delta G$ ) of  $2^+\text{CH}_4$  (a),  $2^+\text{TS}$  (b), and  $2^+\text{CH}_3$  (c).



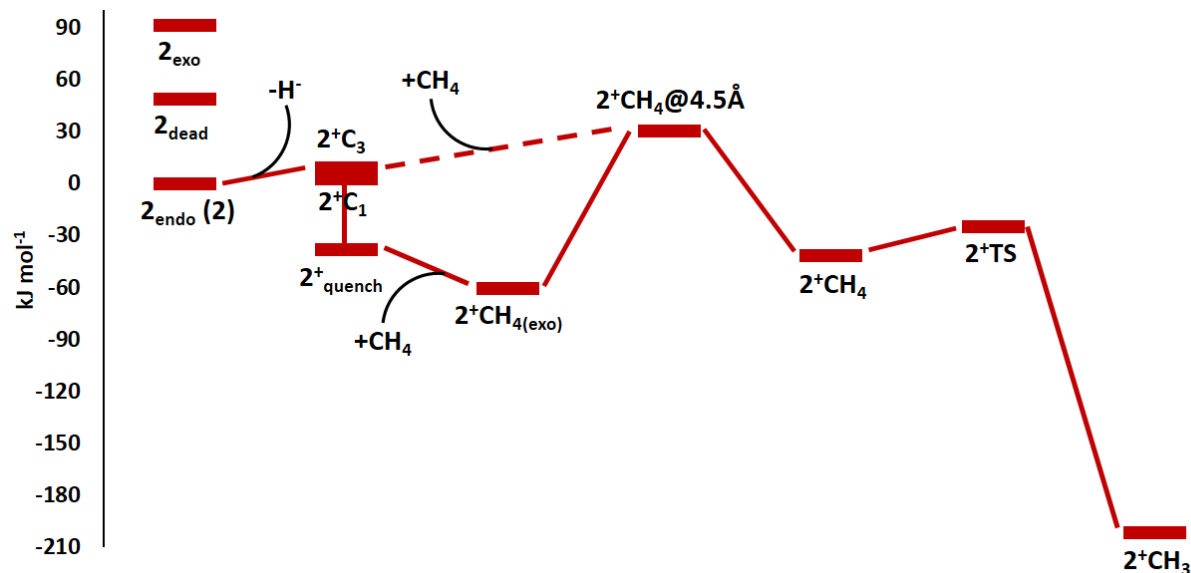

**Figure S6.** Relative energies ( $\Delta E$ , dark red) of structural isomers (e.g. exo-, dead-, and endo-variants of the neutral starting state **2**, the activated states of  $2^+$ , or the methane complex,  $2^+\text{CH}_4$ , with the  $\text{CH}_4$ -fragment at different  $\text{Si}\cdots\text{CH}_4$  distances, the transition-state towards deprotonation ( $2^+\text{TS}$ ), as well as the final complex with a  $\text{Si}-\text{CH}_3$  and a  $\text{HP}_{\text{xant}}\text{Bu}_2$  group ( $2^+\text{CH}_3$ ). Due to the complexity of the scheme, no  $\Delta G$  values are displayed, and  $\Delta E$  values for the methane complexes are not corrected for BSSE or the 1-atm-to-1-M conversion. The scheme thus serves a rather qualitative picture of complex formation and structural transformations. Starting from the neutral  $2_{\text{endo}}$  (**2**) as the likely main product of ligand synthesis, hydride abstraction is almost energy neutral, providing  $2^+\text{C}_3$ . Unfortunately, there is no energy barrier for  $2^+\text{C}_3$  to directly convert into  $2^+\text{C}_1$  and finally into  $2^+\text{quench}$ , which has a short  $\text{Si}-\text{P}$  bond. Adding  $\text{CH}_4$  gas may cause formation of a methane adduct in which  $\text{CH}_4$  resides at the outer parts of the charged ligand,  $2^+\text{CH}_4(\text{exo})$ , from which a considerable energy barrier of circa  $90 \text{ kJ mol}^{-1}$  has to be overcome to form the desired methane complex  $2^+\text{CH}_4$ . It is yet unclear if purging **2** with pressurized  $\text{CH}_4$  gas *via* hydrogen abstraction may give access to a shortcut (dashed line), preventing quenching of the system. Once the  $\text{C}_3$ -symmetric  $2^+\text{CH}_4$  is formed, the ligand exerts an exit-barrier, which is significantly larger than the transition-state towards deprotonation, ultimately forming an  $\text{Si}-\text{CH}_3$  complex.

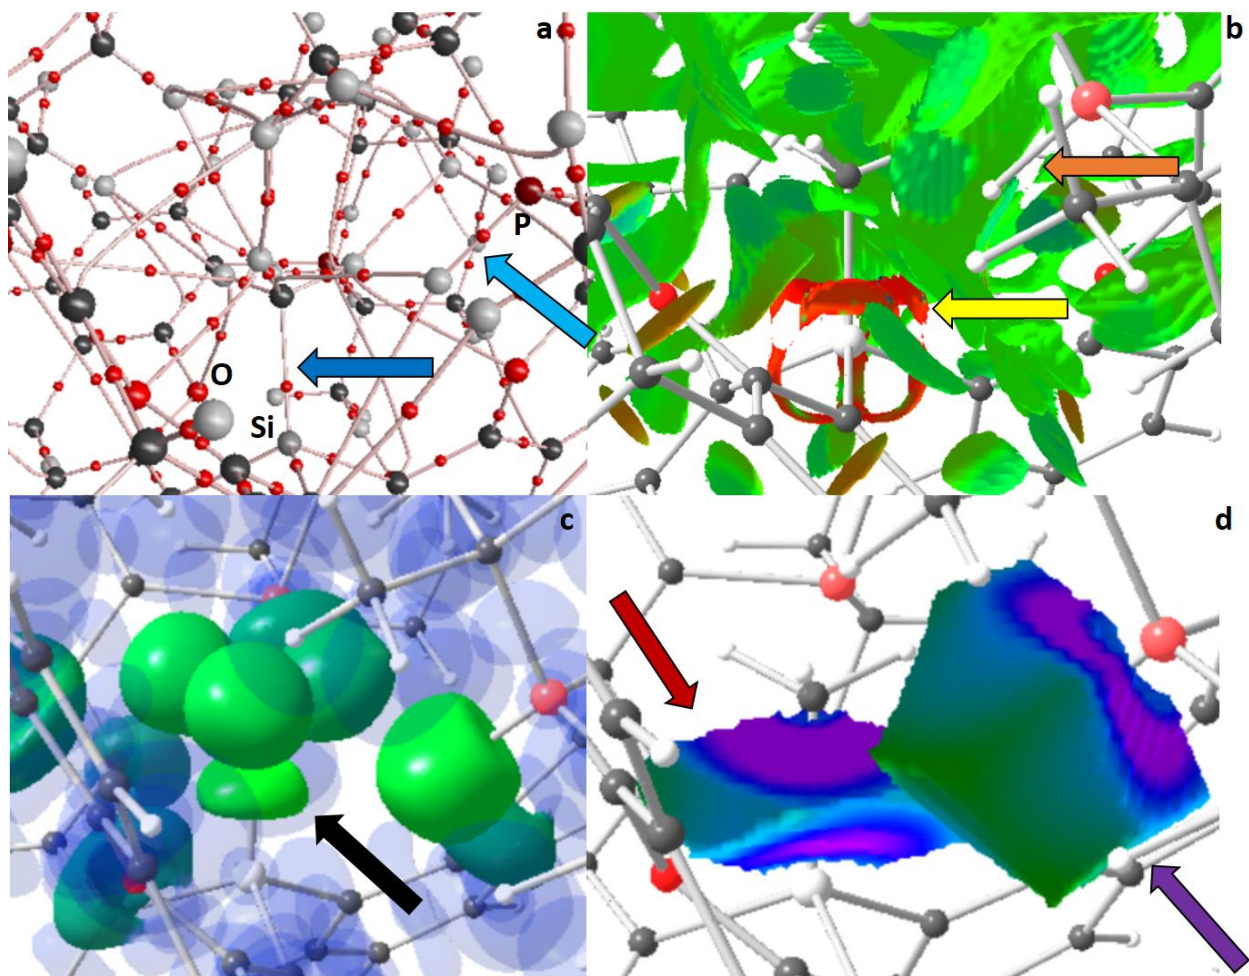

**Figure S7.** RSBI analysis of  $2^+\text{CH}_3$  (a) AIM bond paths motif, (b) NCI *iso*-surface at  $s(r) = 0.5$ , (c) ELI-D localization domain representation at an *iso*-value of 1.4, (d) ELI-D distribution mapped on the Si- $\text{C}_{\text{CH}_4}$  ELI-D bonding as well as on the H basin of the H atom being transferred to the P atom. Color code atoms: hydrogen – light gray, carbon – medium gray, oxygen – medium red, phosphor – dark or pale red.



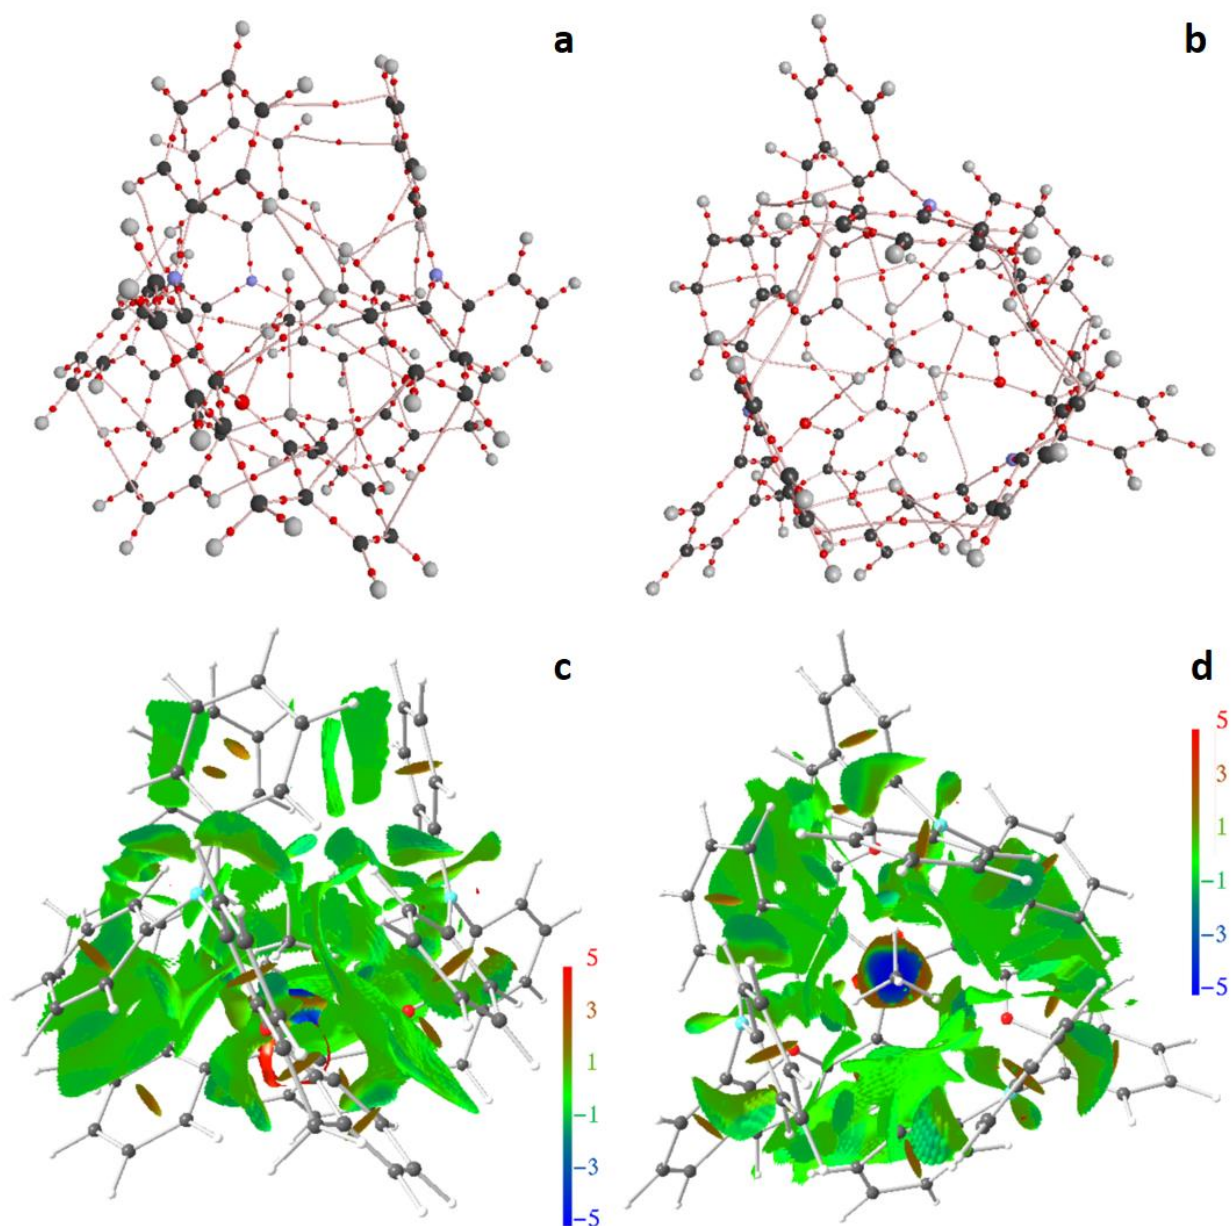

**Figure S8.** RSBI analysis (side and top views) of  $1^+\text{CH}_4$  (a,b) AIM bond paths motif, (c,d) NCI *iso*-surface at  $s(r) = 0.5$ . The Si–C NCI domain is disc-shaped, indicating dominance of ionic bond contributions. The molecule complies C3-symmetry.

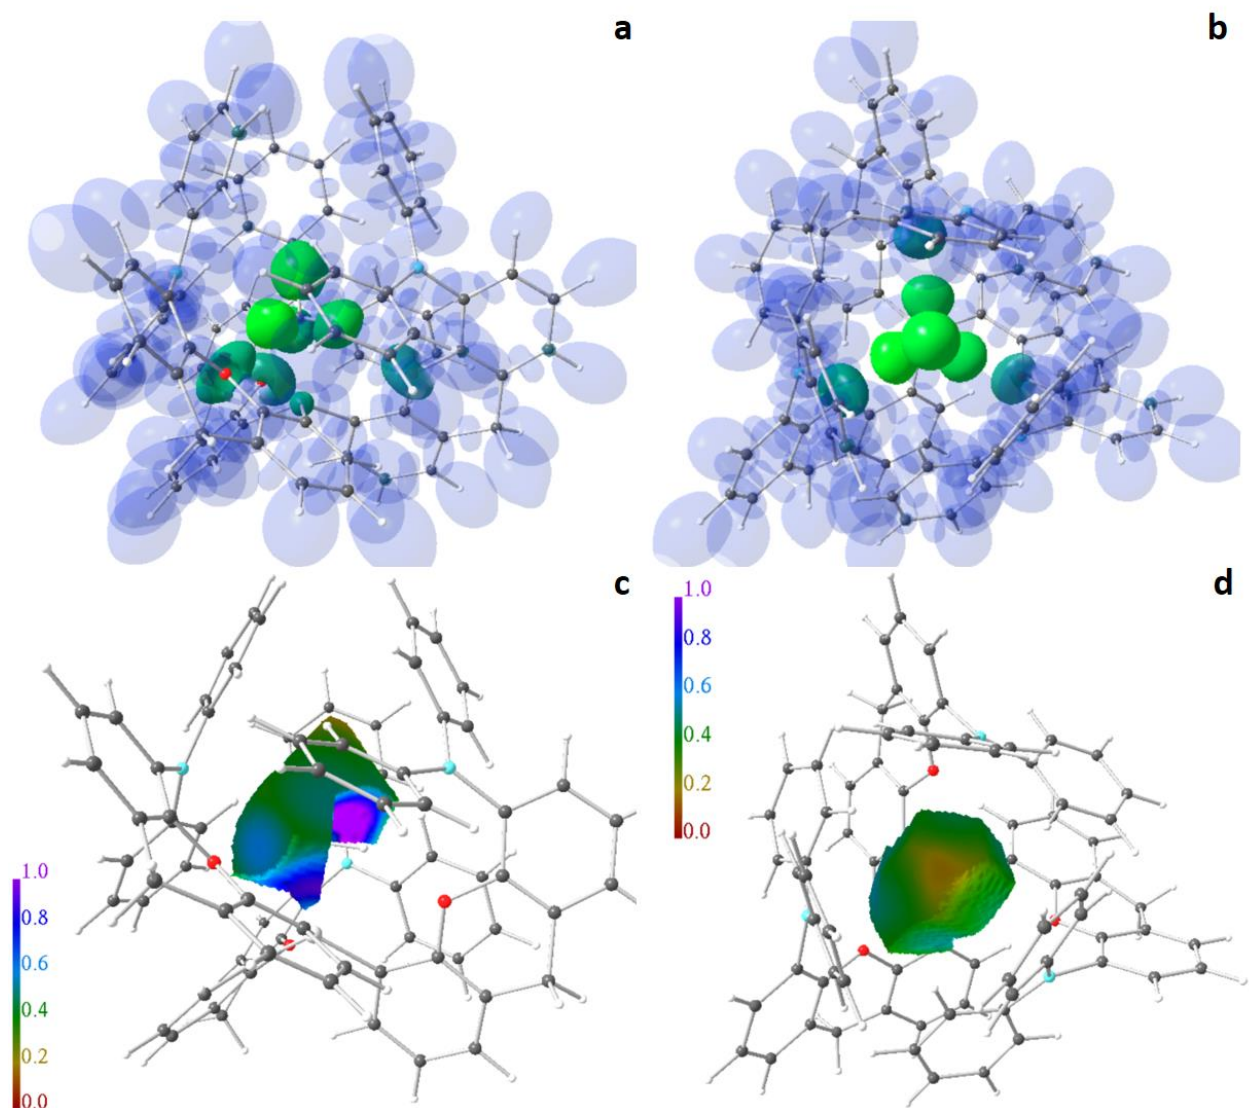

**Figure S9.** RSBI analysis (side and top views) of  $1^+\text{CH}_4$  (a,b) ELI-D localization domain representation at an *iso*-value of 1.4, (c,d) ELI-D distribution mapped two  $\text{HCH}_4$  ELI-D basins (equatorial and axial). The purple-colored excrescence towards the Si atom (center of part c) indicates the pre-formation of a separate Si-C ELI-D bonding basin and thus the uprise of covalent bond contributions.

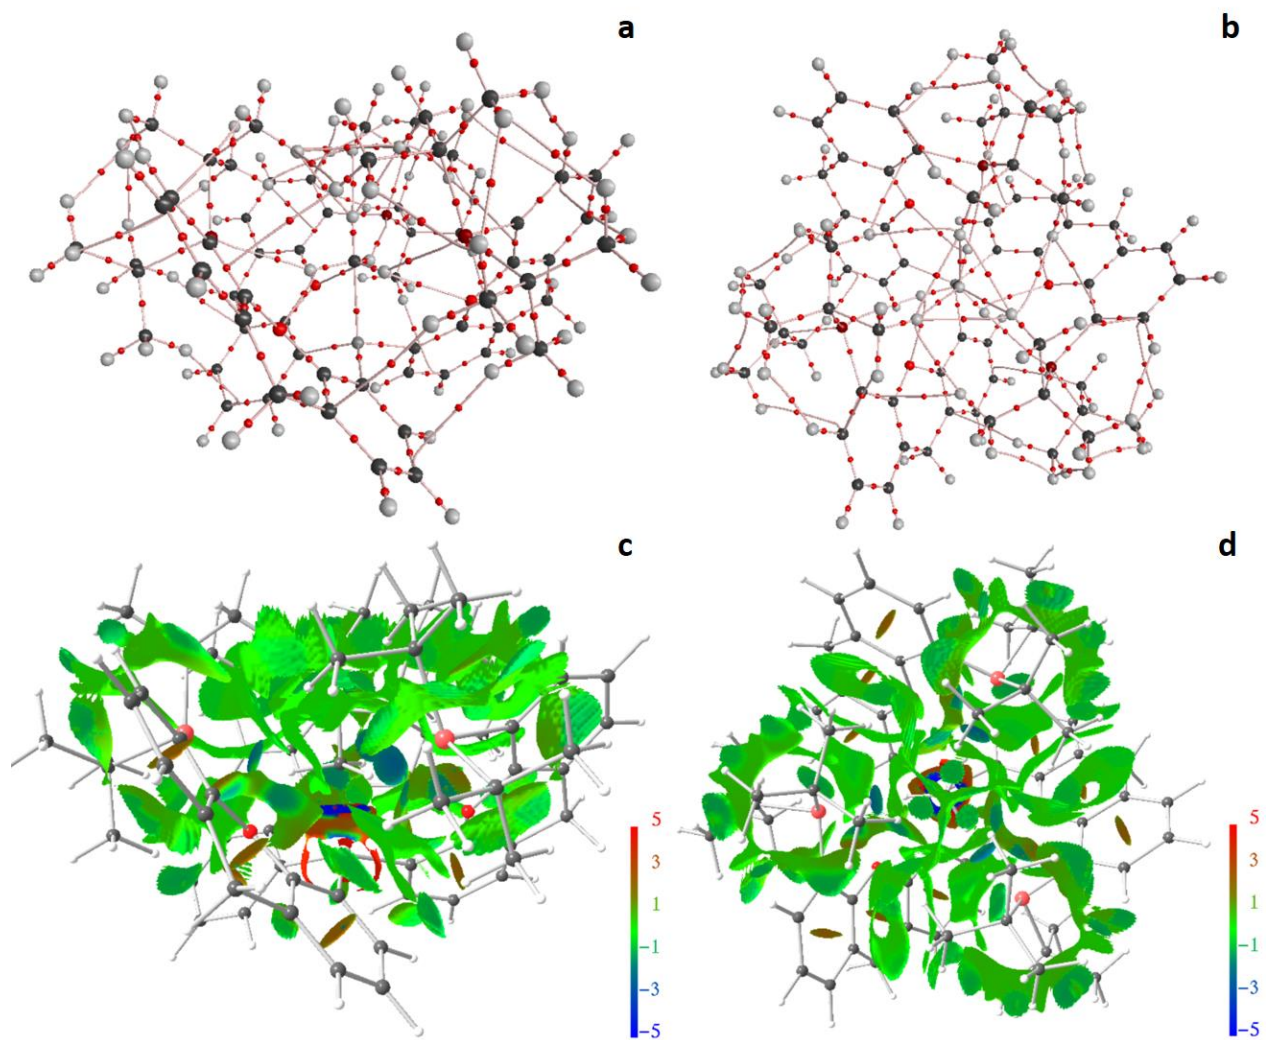

**Figure S10.** RSBI analysis (side and top views) of  $2^+\text{CH}_4$  (a,b) AIM bond paths motif, (c,d) NCI *iso*-surface at  $s(r) = 0.5$ . The Si-C NCI domain is ring-shaped, indicating coexistence of ionic and covalent bond contributions. The molecule complies  $C_3$ -symmetry.



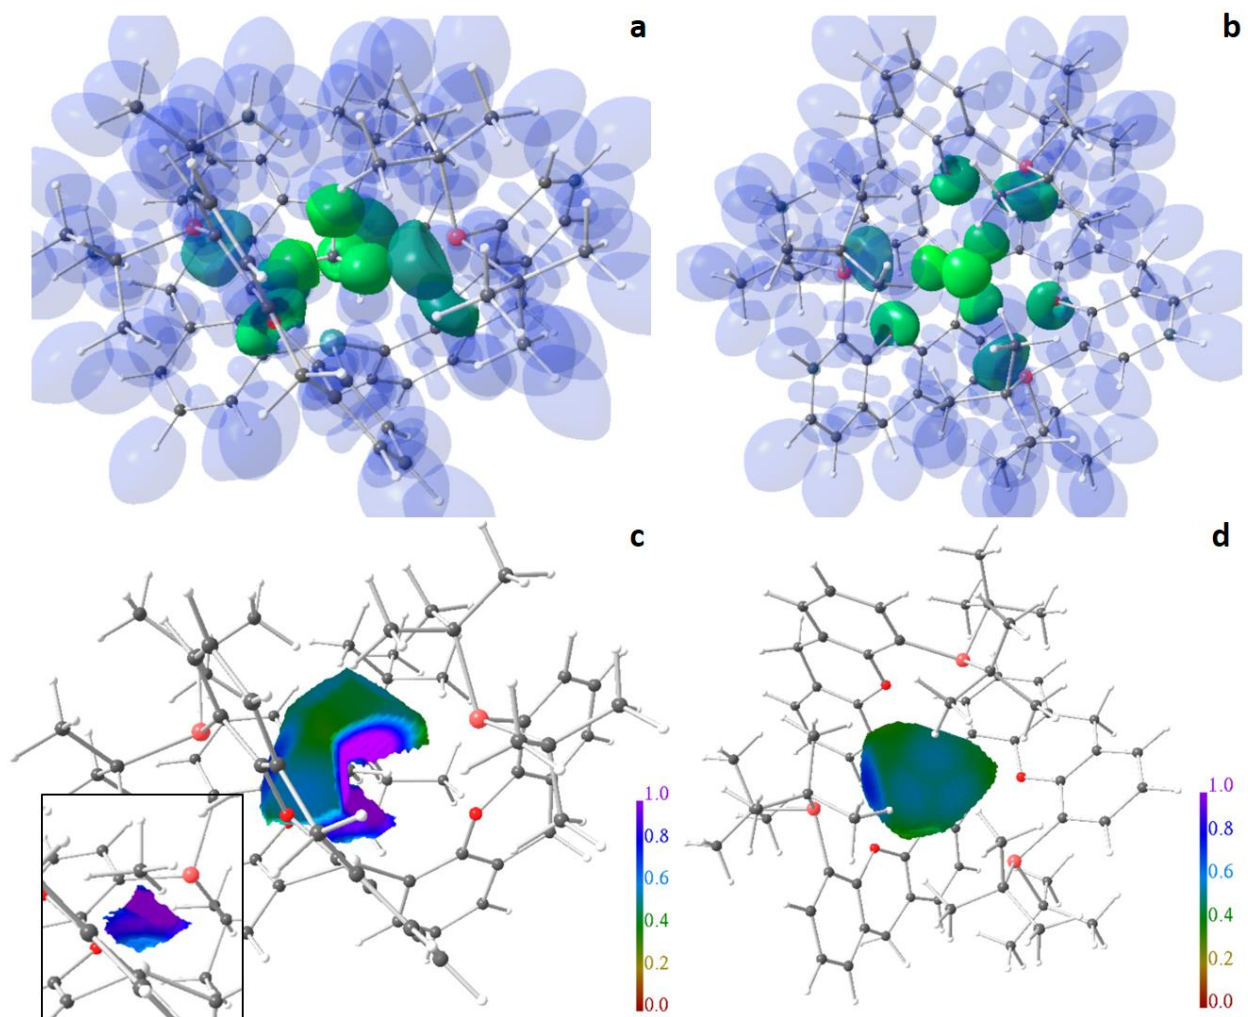

**Figure S11.** RSBI analysis (side and top views) of  $2^+\text{CH}_4$  (a,b) ELI-D localization domain representation at an *iso*-value of 1.4, (c,d) ELI-D distribution mapped on the small Si-C ELI-D bonding basin as well as on two  $\text{HCH}_4$  basins (equatorial and axial). The inset in part c displays the topologically separated Si-C ELI-D bonding basin highlighting the relevance of covalent bond contributions to this interaction.

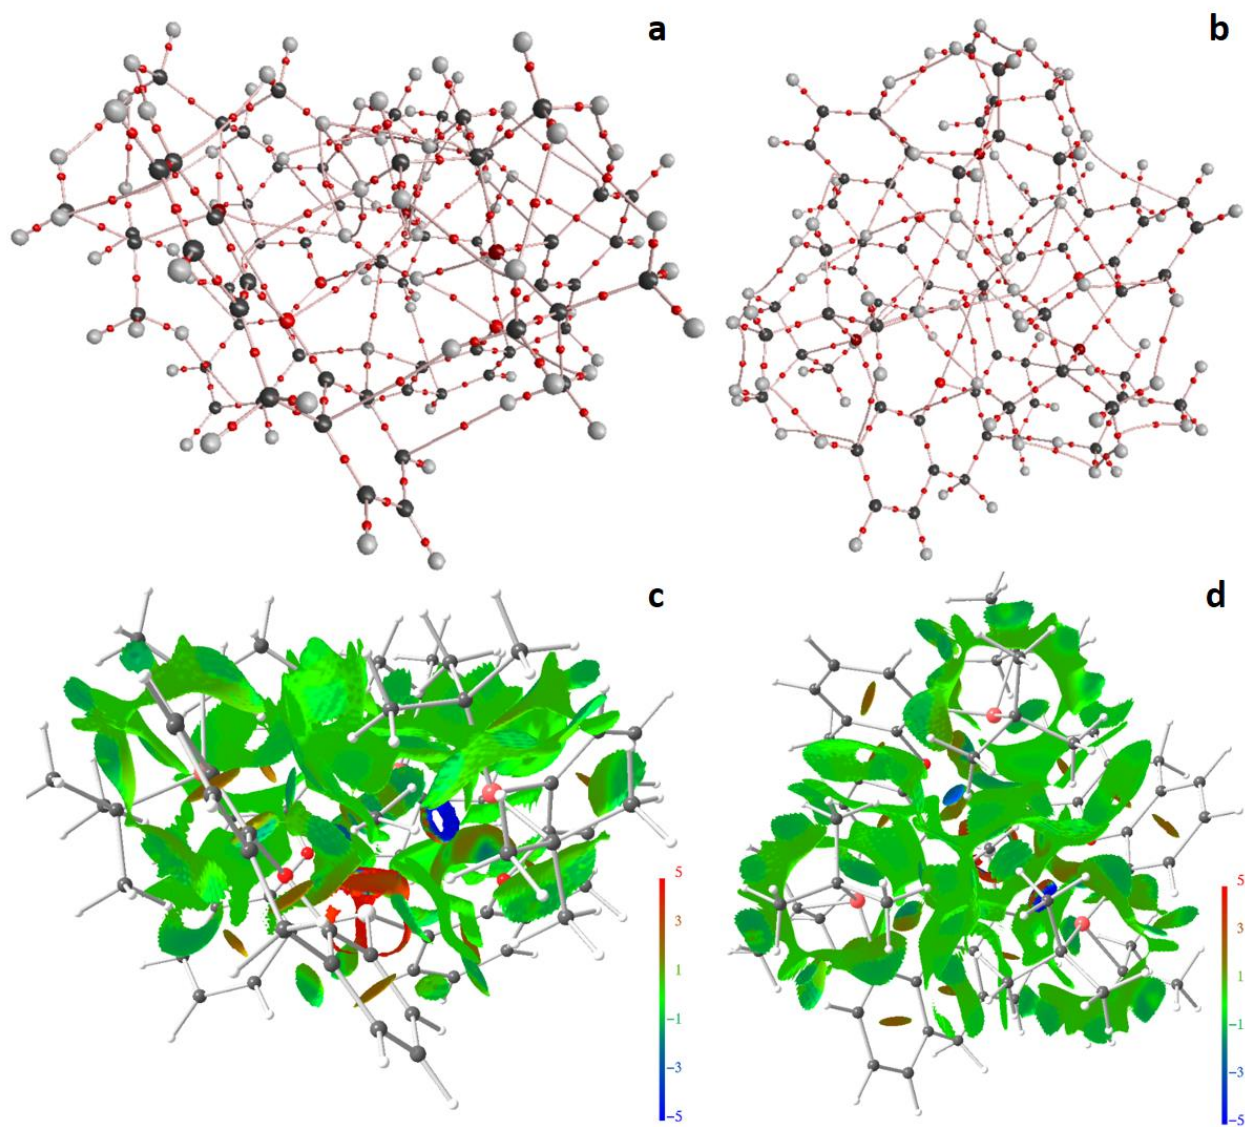

**Figure S12.** RSBI analysis (side and top views) of  $2^+TS$  (a,b) AIM bond paths motif, (c,d) NCI *iso*-surface at  $s(r) = 0.5$ . A ring-shaped  $P \cdots H_{CH_4}$  NCI domain is formed.



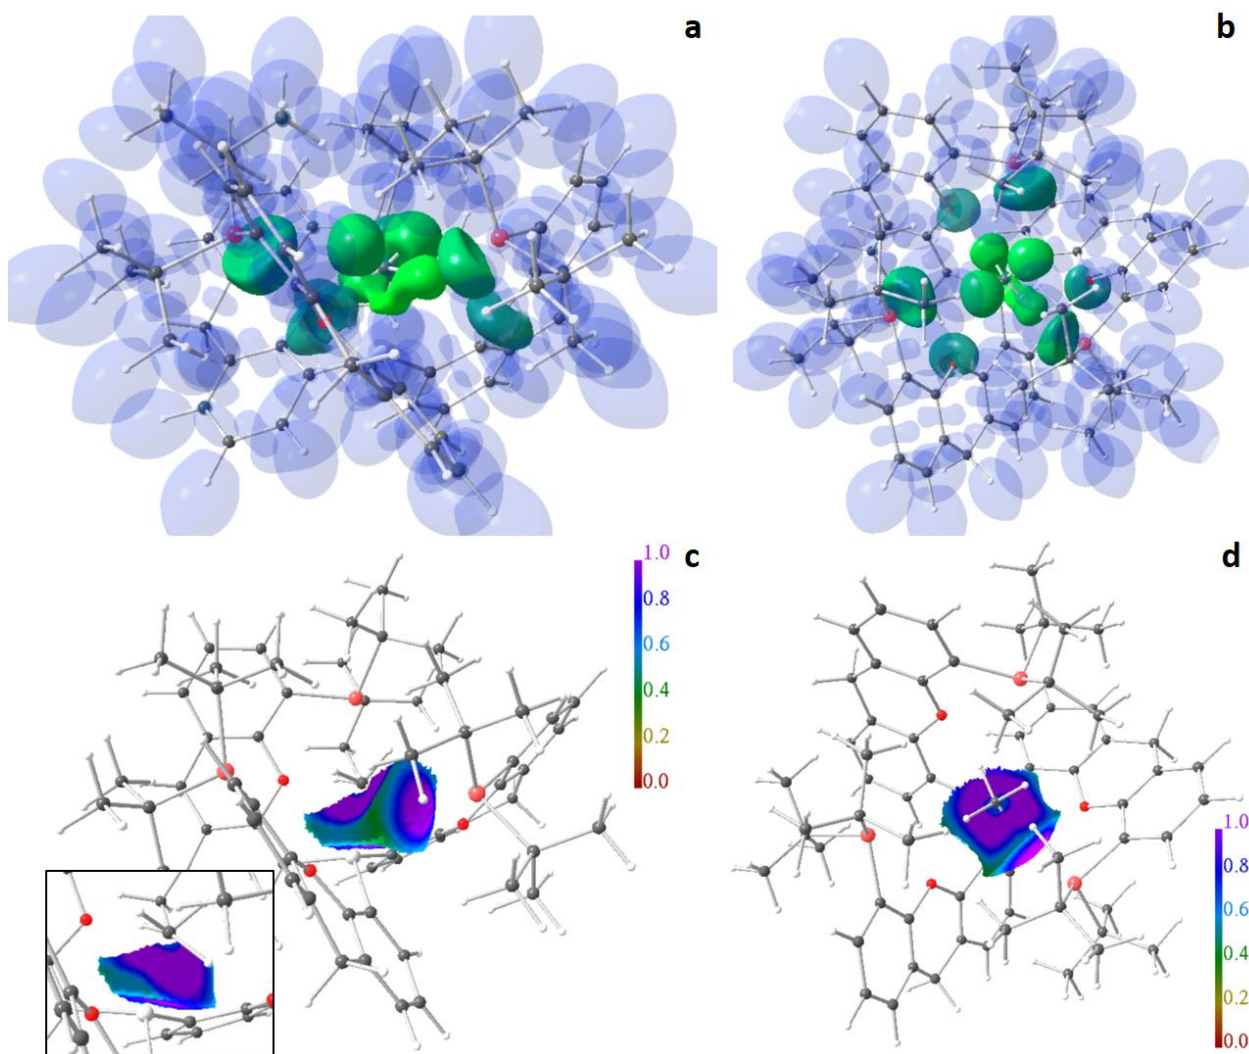

**Figure S13.** RSBI analysis (side and top views) of  $2^+TS$  (a,b) ELI-D localization domain representation at an *iso*-value of 1.4, (c,d) ELI-D distribution mapped on the Si-C ELI-D bonding basin as well as on the  $H_{CH_4}$  basins (equatorial) of the transferred H atom. The inset in part c displays the Si-C ELI-D bonding basin highlighting the relevance of covalent bond contributions to this interaction.

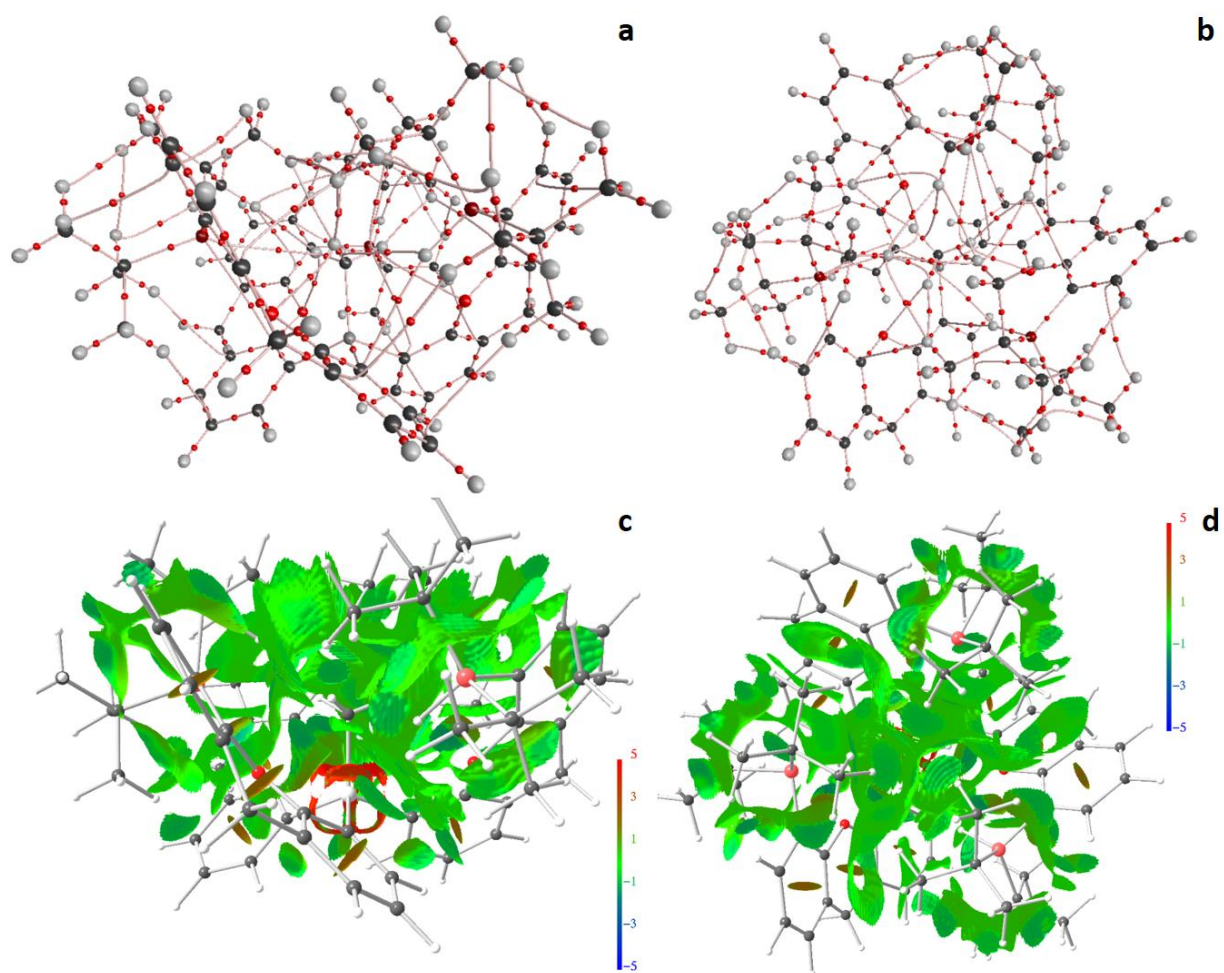

**Figure S14.** RSBI analysis (side and top views) of  $2^+\text{CH}_3$  (a,b) AIM bond paths motif, (c,d) NCI *iso*-surface at  $s(r) = 0.5$ . The NCI top view shows that the void-space around the Si-CH<sub>3</sub> part is “closed” again as it is fully covered by green H···H contact patches.

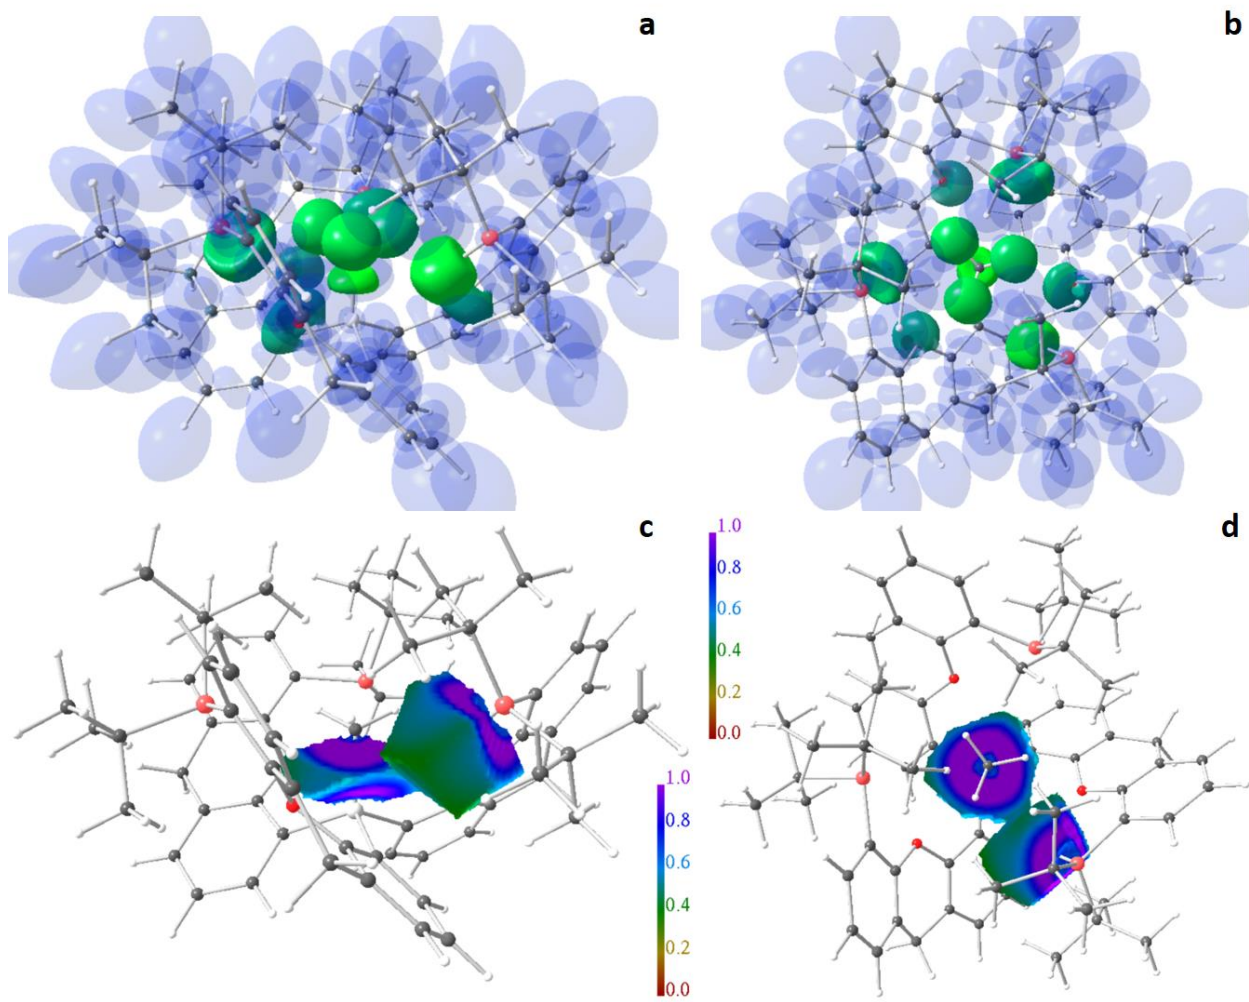

**Figure S15.** RSBI analysis (side and top views) of  $2^+\text{CH}_3$  (a,b) ELI-D localization domain representation at an *iso*-value of 1.4, (c,d) ELI-D distribution mapped on the Si-C ELI-D bonding basin as well as on the  $\text{H}_{\text{CH}_4}$  basin (equatorial) of the transferred H atom, which is now attached to the P atom.

**Table S1.** Relative energies ( $\Delta E$ ) and enthalpies ( $\Delta G$ ) of relevant states and transitions

|                                    | <b>1</b> | <b>1<sup>&amp;</sup></b> | <b>2</b>                 | <b>2<sup>&amp;</sup></b> | type            | comment                                                                              |
|------------------------------------|----------|--------------------------|--------------------------|--------------------------|-----------------|--------------------------------------------------------------------------------------|
| exo                                | 103.4    | 98.5                     | 91.2                     | 84.5                     | $\Delta E$      | relative to endo                                                                     |
| endo                               |          |                          |                          |                          |                 |                                                                                      |
| dead                               | 35.2     | 35.1                     | 48.7                     | 46.8                     | $\Delta E$      | relative to endo                                                                     |
| active                             | 27.1     | 21.6                     | 8.9                      | 0.3                      | $\Delta E$      | endo $\rightarrow$ active                                                            |
|                                    | 31.5     |                          | 7.0                      |                          | $\Delta G$      | endo $\rightarrow$ active                                                            |
| complex                            | -43.1    | -52.2                    | -37.1 (9.8) <sup>§</sup> | -50.2(-14.0)             | $\Delta E$      | active $\rightarrow$ complex                                                         |
|                                    | 4.2      |                          | 7.1 (35.5) <sup>§</sup>  |                          | $\Delta G^{\S}$ | active $\rightarrow$ complex                                                         |
| enter                              | 2.2      | 1.6                      | 69.0                     | 67.6                     | $\Delta E$      | relative to <b>1<sup>+</sup></b> or <b>2<sup>+</sup></b> + CH <sub>4</sub>           |
| trap                               | 57.2     | 64.8                     | 72.2                     | 74.2                     | $\Delta E$      | relative to <b>1<sup>+</sup>CH<sub>4</sub></b> or <b>2<sup>+</sup>CH<sub>4</sub></b> |
| <b>2<sup>+</sup>TS</b>             |          |                          | 18.8                     | 20.3                     | $\Delta G$      | <b>2<sup>+</sup>CH<sub>4</sub></b> $\rightarrow$ <b>2<sup>+</sup>TS</b>              |
| <b>2<sup>+</sup>CH<sub>3</sub></b> |          |                          | -181.5                   | -170.3                   | $\Delta G$      | <b>2<sup>+</sup>TS</b> $\rightarrow$ <b>2<sup>+</sup>CH<sub>3</sub></b>              |

“exo”: neutral ligand system with Si–H in exo-position; “endo”: neutral ligand system with Si–H in endo-position; “dead”: neutral ligand system in unfavorable conformation; “active”: charged species (**1<sup>+</sup>** or **2<sup>+</sup>C<sub>3</sub>**; §: numbers in brackets for **2** use **2<sup>+</sup>quench** as reference); “complex”: CH<sub>4</sub>-complexes (**1<sup>+</sup>CH<sub>4</sub>** or **2<sup>+</sup>CH<sub>4</sub>**;  $\Delta G^{\S}$  values are corrected for BSSE (4.0 or 5.6 kJ mol<sup>-1</sup>) and 1-atm-to-1-M conversion (7.9 kJ mol<sup>-1</sup>); “enter”: estimated energy barrier to enter the void – for **1<sup>+</sup>CH<sub>4</sub>** this refers to a Si $\cdots$ C distance of 7.5 Å, for **2<sup>+</sup>CH<sub>4</sub>** this refers to a Si $\cdots$ C distance of 4.5 Å; “trap”: estimated energy barrier to leave the void after complex formation; TS: transition state; &: single-point calculations at the higher 6-311+G(2df,p) basis-set using the structural coordinates of the optimizations conducted using the 6-31+G\* basis-set; corresponding BSSE-values are 3.0 and 3.4 kJ mol<sup>-1</sup>.

**Table S2.** Thermodynamic parameters.

| model           | <sup>+</sup> CPh <sub>3</sub>         | HCPPh <sub>3</sub>    | <b>1</b>                           | <b>1<sup>+</sup></b>               | <b>2</b>               | <b>2<sup>+</sup>C<sub>3</sub></b>  |
|-----------------|---------------------------------------|-----------------------|------------------------------------|------------------------------------|------------------------|------------------------------------|
| E (a.u.)        | -732.6888                             | -733.4911             | -3480.2067                         | -3479.3940                         | -3986.8901             | -3986.0843                         |
| ZPVE (kcal/mol) | 176.8140                              | 183.1631              | 686.3394                           | 682.5798                           | 800.4500               | 795.4848                           |
| ZPE-corr (H/n)  | 0.2818                                | 0.2919                | 1.0938                             | 1.0878                             | 1.2756                 | 1.2677                             |
| TD-E corr       | 0.2963                                | 0.3069                | 1.1582                             | 1.1523                             | 1.3470                 | 1.3393                             |
| TD-H corr       | 0.2972                                | 0.3079                | 1.1592                             | 1.1532                             | 1.3480                 | 1.3402                             |
| TD-G corr       | 0.2395                                | 0.2468                | 0.9937                             | 0.9882                             | 1.1748                 | 1.1668                             |
| E+ZPE           | -732.4070                             | -733.1993             | -3479.1130                         | -3478.3063                         | -3985.6145             | -3984.8166                         |
| E+TD-E          | -732.3925                             | -733.1842             | -3479.0485                         | -3478.2418                         | -3985.5430             | -3984.7450                         |
| E+TD-H          | -732.3915                             | -733.1833             | -3479.0476                         | -3478.2408                         | -3985.5421             | -3984.7441                         |
| E+TD-G          | -732.4493                             | -733.2444             | -3479.2130                         | -3478.4059                         | -3985.7153             | -3984.9175                         |
| E-TD (Kcal/Mol) | 185.9                                 | 192.6                 | 726.8                              | 723.1                              | 845.3                  | 838.6                              |
| CV (Cal/molK)   | 59.1                                  | 60.0                  | 263.0                              | 262.7                              | 287.7                  | 280.8                              |
| S (Cal/molK)    | 121.5                                 | 128.6                 | 348.2                              | 347.3                              | 264.5                  | 280.4                              |
| model           | <b>2<sup>+</sup><sub>quench</sub></b> | <b>CH<sub>4</sub></b> | <b>1<sup>+</sup>CH<sub>4</sub></b> | <b>2<sup>+</sup>CH<sub>4</sub></b> | <b>2<sup>+</sup>TS</b> | <b>2<sup>+</sup>CH<sub>3</sub></b> |
| E (a.u.)        | -3986.1022                            | -40.5069              | -3519.9207                         | -4026.6104                         | -4026.6041             | -4026.6777                         |
| ZPVE (kcal/mol) | 797.6287                              | 28.2112               | 712.3010                           | 824.0968                           | 823.1824               | 825.9928                           |
| ZPE-corr (H/n)  | 1.2711                                | 0.0450                | 1.1351                             | 1.3133                             | 1.3118                 | 1.3163                             |
| TD-E corr       | 1.3414                                | 0.0478                | 1.2031                             | 1.3876                             | 1.3847                 | 1.3889                             |
| TD-H corr       | 1.3424                                | 0.0488                | 1.2041                             | 1.3886                             | 1.3856                 | 1.3898                             |
| TD-G corr       | 1.1739                                | 0.0276                | 1.0327                             | 1.2113                             | 1.2121                 | 1.2165                             |
| E+ZPE           | -3984.8311                            | -40.4619              | -3518.7856                         | -4025.2971                         | -4025.2923             | -4025.3613                         |
| E+TD-E          | -3984.7608                            | -40.4590              | -3518.7176                         | -4025.2228                         | -4025.2194             | -4025.2888                         |
| E+TD-H          | -3984.7598                            | -40.4581              | -3518.7167                         | -4025.2218                         | -4025.2185             | -4025.2878                         |
| E+TD-G          | -3984.9283                            | -40.4792              | -3518.8880                         | -4025.3991                         | -4025.3920             | -4025.4611                         |
| E-TD (Kcal/Mol) | 841.8                                 | 30.0                  | 755.0                              | 870.8                              | 868.9                  | 871.5                              |
| CV (Cal/molK)   | 285.5                                 | 6.5                   | 274.0                              | 297.5                              | 294.7                  | 293.2                              |
| S (Cal/molK)    | 354.7                                 | 44.5                  | 360.6                              | 373.2                              | 365.2                  | 364.7                              |



**Scheme S1:** Potential synthesis route for **1**

Dichloromethane would be the typically used solvent as it doesn't quench the Lewis acidic sites (as donor solvents, such as THF, ethers etc., but also electron rich aromatic solvents, such as toluene, benzene etc. would do). A proposed reaction pathway for the preparation of the host system is outlined as follows:

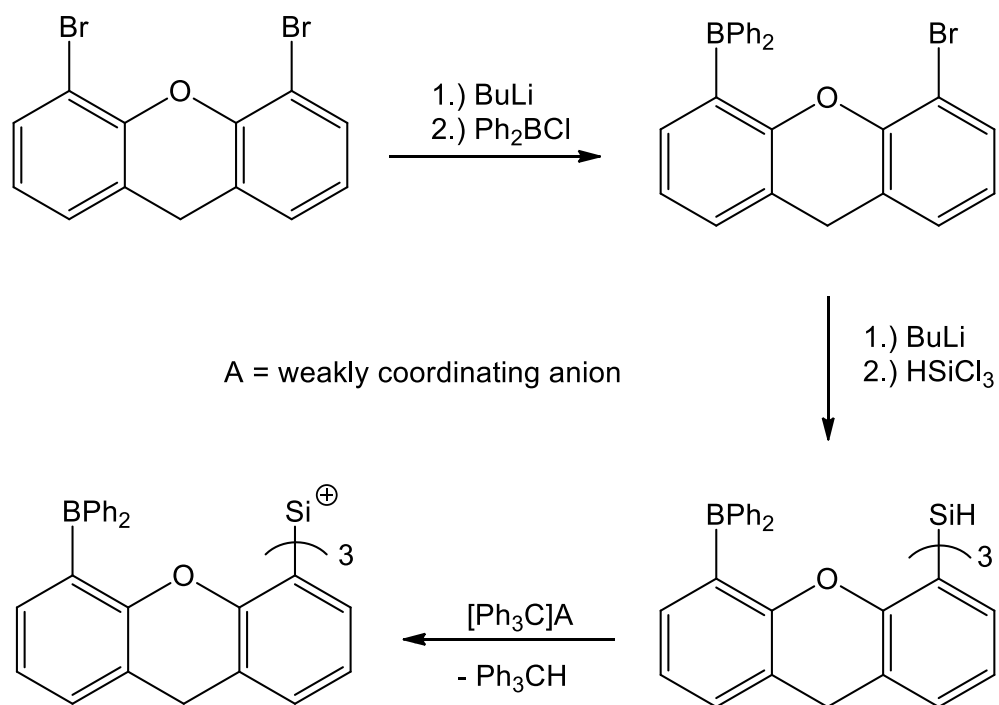

All steps involve common reagents and conditions typically employed in synthetic organometallic chemistry.
